# Supplementary material for: Differences in minimal disease knowledge of keratoconus patients: results from an international survey
Source: HighWire-hosted journal article supplement (doi:10.1136/bmjophth-2022-001164), 2023-05-01
Supplement: bmjophth-2022-001164supp002_data_supplement.pdf [file bmjophth-2022-001164supp002_data_supplement.pdf]

1 **Table 2**

| Characteristics                          |              | Overall<br>(n=200) | % / SD  | Liverpool<br>(n=50) | % / SD | Newcastle<br>(n=50) | % / SD | Baltimore<br>(n=50) | % / SD  | Dublin<br>(n=50) | % / SD |
|------------------------------------------|--------------|--------------------|---------|---------------------|--------|---------------------|--------|---------------------|---------|------------------|--------|
| <b>Male gender</b>                       |              | 132                | 66.0%   | 41                  | 82.0%  | 33                  | 66.0%  | 24                  | 48.0%   | 34               | 68.0%  |
| <b>Mean age</b>                          |              | 30.2               | SD 11.3 | 27.0                | SD 9.8 | 26.8                | SD 9.5 | 38.0                | SD 13.3 | 28.8             | SD 8.3 |
| <b>University degree</b>                 |              | 76                 | 38.0%   | 27                  | 54.0%  | 10                  | 20.0%  | 17                  | 34.0%   | 22               | 44.0%  |
| <b>Medical education, self-reported</b>  |              | 20                 | 10.0%   | 2                   | 4.0%   | 4                   | 8.0%   | 8                   | 16.0%   | 6                | 12.0%  |
| <b>Keratoconus in social environment</b> | Parents      | 12                 | 6.0%    | 5                   | 10.0%  | 1                   | 2.0%   | 4                   | 8.0%    | 2                | 4.0%   |
|                                          | Grandparents | 2                  | 1.0%    | 0                   | 0%     | 2                   | 4.0%   | 0                   | 0%      | 0                | 0%     |
|                                          | Siblings     | 15                 | 7.5%    | 2                   | 4.0%   | 3                   | 6.0%   | 4                   | 8.0%    | 6                | 12.0%  |
|                                          | Children     | 0                  | 0%      | 0                   | 0%     | 0                   | 0%     | 0                   | 0%      | 0                | 0%     |
|                                          | Uncle/aunt   | 3                  | 1.5%    | 1                   | 2.0%   | 0                   | 0%     | 1                   | 2.0%    | 1                | 2.0%   |
|                                          | Cousin       | 3                  | 1.5%    | 1                   | 2.0%   | 1                   | 2.0%   | 0                   | 0%      | 1                | 2.0%   |
|                                          | Partner      | 0                  | 0%      | 0                   | 0%     | 0                   | 0%     | 0                   | 0%      | 0                | 0%     |

|                                                     |                            |      |         |      |         |      |         |      |         |      |         |
|-----------------------------------------------------|----------------------------|------|---------|------|---------|------|---------|------|---------|------|---------|
|                                                     | Friends                    | 0    | 0%      | 0    | 0%      | 0    | 0%      | 0    | 0%      | 0    | 0%      |
| <b>Affected eye</b>                                 | Right                      | 176  | 88.0%   | 43   | 86.0%   | 43   | 86.0%   | 42   | 92.0%   | 44   | 88.0%   |
|                                                     | Left                       | 183  | 91.5%   | 42   | 84.0%   | 45   | 90.0%   | 48   | 96.0%   | 48   | 96.0%   |
|                                                     | Both                       | 80   | 40.0%   | 36   | 72.0%   | 38   | 76.0%   | 44   | 88.0%   | 42   | 84.0%   |
| <b>Ways of improving visual acuity</b>              | None                       | 38   | 19.0%   | 9    | 18.0%   | 4    | 8.0%    | 13   | 26.0%   | 12   | 24.0%   |
|                                                     | Glasses                    | 124  | 62.0%   | 32   | 64.0%   | 39   | 78.0%   | 22   | 44.0%   | 31   | 62.0%   |
|                                                     | Hard contact lenses        | 55   | 27.5%   | 11   | 22.0%   | 10   | 20.0%   | 22   | 44.0%   | 12   | 24.0%   |
| <b>Surgical interventions</b>                       | Corneal Crosslinking       | 94   | 47.0%   | 30   | 60.0%   | 11   | 22.0%   | 10   | 20.0%   | 43   | 86.0%   |
|                                                     | Corneal transplant         | 21   | 10.5%   | 4    | 9.0%    | 3    | 6.0%    | 12   | 24.0%   | 2    | 4.0%    |
|                                                     | Intracorneal ring segments | 1    | 0.5%    | 1    | 2.0%    | 0    | 0%      | 0    | 0%      | 0    | 0%      |
| <b>Best corrected visual acuity (Snellen Chart)</b> | Right                      | 0.32 | SD 0.42 | 0.34 | SD 0.35 | 0.16 | SD 0.33 | 0.45 | SD 0.48 | 0.33 | SD 0.44 |
|                                                     | Left                       | 0.36 | SD 0.43 | 0.46 | SD 0.55 | 0.19 | SD 0.27 | 0.46 | SD 0.45 | 0.34 | SD 0.37 |

|                                       |       |      |         |      |         |      |         |      |        |        |        |
|---------------------------------------|-------|------|---------|------|---------|------|---------|------|--------|--------|--------|
| <b>Belin-Ambrosio Deviation Score</b> | Right | 8.8  | SD 7.7  | 9.3  | SD 7.8  | 7.9  | SD 5.8  | *    | 9.2    | SD 9.2 |        |
|                                       | Left  | 9.9  | SD 8.4  | 10.2 | SD 10.7 | 9.6  | SD 6.4  | *    | 9.8    | SD 7.7 |        |
| <b>Maximum keratometry (Kmax)</b>     | Right | 55.2 | SD 9.9  | 56.0 | SD 11.4 | 56.1 | SD 10.7 | 51.8 | SD 7.4 | 55.6   | SD 8.4 |
|                                       | Left  | 56.5 | SD 11.1 | 55.7 | SD 11.8 | 60.0 | SD 13.1 | 50.7 | SD 7.2 | 57.2   | SD 8.8 |

2

3 \*No access to Pentacam at this cite
